# Supplementary material
Source: HighWire-hosted journal article supplement (https://www.ajnr.org/highwire/filestream/62964/field_highwire_adjunct_files/0/18-00274.pdf)
Supplement: 18-00274.pdf [file 18-00274.pdf]

**On-line Table 1: Wilcoxon rank sum test for proportion of enhancing meningeal foci persisting at 1 year versus demographic and clinical factors<sup>a</sup>**

|                                                                | On Treatment              | Not on Treatment         | Progressive MS            | Nonprogressive MS         | EDSS                            | EDSS                               |
|----------------------------------------------------------------|---------------------------|--------------------------|---------------------------|---------------------------|---------------------------------|------------------------------------|
|                                                                | (n = 25) 1.00 (0.44–1.00) | (n = 6) 0.97 (0.50–1.00) | (n = 10) 1.00 (0.50–1.00) | (n = 21) 1.00 (0.44–1.00) | Progressor at 1 yr <sup>b</sup> | Nonprogressor at 1 yr <sup>b</sup> |
| Proportion of overall foci persisting at 1 yr                  | (n = 22) 1.00 (0.25–1.00) | (n = 6) 0.92 (0.00–1.00) | (n = 9) 1.00 (0.00–1.00)  | (n = 19) 1.00 (0.25–1.00) | (n = 7) 1.00 (0.64–1.00)        | (n = 24) 1.00 (0.44–1.00)          |
| Proportion of subarachnoid spread/fill foci persisting at 1 yr | (n = 9) 1.00 (0.00–1.00)  | (n = 1) 1.00 (1.00–1.00) | (n = 0)                   | (n = 10) 1.00 (0.00–1.00) | (n = 1) 0.00 (0.00–0.00)        | (n = 9) 1.00 (0.50–1.00)           |
| Proportion of subarachnoid nodular foci persisting at 1 yr     | (n = 19) 1.00 (0.83–1.00) | (n = 6) 1.00 (0.75–1.00) | (n = 8) 1.00 (0.75–1.00)  | (n = 17) 1.00 (0.83–1.00) | (n = 6) 1.00 (1.00–1.00)        | (n = 19) 1.00 (0.75–1.0)           |
| Proportion of dural foci persisting at 1 yr                    | (n = 14) 1.00 (1.00–1.00) | (n = 4) 1.00 (1.00–1.00) | (n = 7) 1.00 (1.00–1.00)  | (n = 11) 1.00 (1.00–1.00) | (n = 4) 1.00 (1.00–1.00)        | (n = 14) 1.00 (1.00–1.00)          |

**Note:**—Progressive MS indicates primary-progressive and secondary-progressive MS; Nonprogressive MS, relapsing-remitting MS.

<sup>a</sup> Median values are listed with the range of observed values in parentheses.

<sup>b</sup> Criteria for EDSS progressor status as listed in the “Materials and Methods” section.

**On-line Table 2: Spearman  $\rho$  test for number of enhancing meningeal foci persisting at 1 year versus demographic and clinical factors**

|                                                                  | Age (yr) <sup>a</sup> | Disease Duration (yr) <sup>a</sup> | EDSS at Baseline | Change of EDSS at 1 yr | MFS at Baseline | Change of MFS at 1 yr | SDMT at Baseline | Change of SDMT at 1 yr |
|------------------------------------------------------------------|-----------------------|------------------------------------|------------------|------------------------|-----------------|-----------------------|------------------|------------------------|
| No. of overall foci persisting at 1 yr (31 obs)                  | 0.13                  | 0.03                               | -0.10            | 0.35                   | 0.05            | -0.21                 | -0.16            | 0.28                   |
| No. of subarachnoid spread/fill foci persisting at 1 yr (31 obs) | 0.20                  | 0.21                               | 0.12             | 0.30                   | -0.25           | -0.15                 | -0.08            | 0.31                   |
| No. of subarachnoid nodular foci persisting at 1 yr (31 obs)     | -0.10                 | -0.08                              | -0.17            | -0.39 <sup>b</sup>     | -0.15           | 0.00                  | 0.12             | 0.23                   |
| No. of vessel wall foci persisting at 1 yr (31 obs)              | 0.06                  | 0.09                               | -0.10            | 0.10                   | 0.16            | -0.27                 | -0.13            | 0.23                   |
| No. of dural foci persisting at 1 yr (31 obs)                    | -0.02                 | -0.24                              | -0.01            | -0.01                  | 0.05            | -0.22                 | -0.15            | 0.13                   |

**Note:**—obs indicates subjects; MFS, Modified Fatigue Impact Scale; SDMT, Symbol Digit Modalities Test.

<sup>a</sup> At enrollment.

<sup>b</sup>  $P < .05$ .

**On-line Table 3: Spearman  $\rho$  test for proportion of enhancing meningeal foci persisting at 1 year versus demographic and clinical factors**

|                                                                         | Age (yr) <sup>a</sup> | Disease Duration (yr) <sup>a</sup> | EDSS at Baseline | Change of EDSS at 1 yr | MFIS at Baseline | Change of MFIS at 1 yr | SDMT at Baseline  | Change of SDMT at 1 yr |
|-------------------------------------------------------------------------|-----------------------|------------------------------------|------------------|------------------------|------------------|------------------------|-------------------|------------------------|
| Proportion of overall foci persisting at 1 yr (31 obs)                  | 0.04                  | -0.12                              | -0.20            | -0.09                  | -0.13            | 0.08                   | 0.45 <sup>b</sup> | -0.31                  |
| Proportion of subarachnoid spread/fill foci persisting at 1 yr (28 obs) | 0.04                  | -0.08                              | -0.19            | -0.09                  | -0.17            | 0.17                   | 0.48 <sup>b</sup> | -0.26                  |
| Proportion of subarachnoid nodular foci persisting at 1 yr (10 obs)     | 0.02                  | 0.27                               | -0.41            | -0.76 <sup>b</sup>     | -0.25            | 0.09                   | 0.29              | -0.15                  |
| Proportion of vessel wall foci persisting at 1 yr (25 obs)              | 0.10                  | -0.01                              | -0.23            | 0.16                   | -0.22            | 0.14                   | 0.20              | -0.11                  |
| Proportion of dural foci persisting at 1 yr (14 obs)                    | NA                    | NA                                 | NA               | NA                     | NA               | NA                     | NA                | NA                     |

**Note:**—NA indicates not applicable because all participants had 100% persistence of this subtype and correlations with other variables could not be calculated; obs, subjects; MFIS, Modified Fatigue Impact Scale; SDMT, Symbol Digit Modalities Test.

<sup>a</sup> At enrollment.

<sup>b</sup>  $P < .05$ .
